# Supplementary material
Source: PubMed Central journal article supplement (PMC1782372)

## EpsL and its derivatives

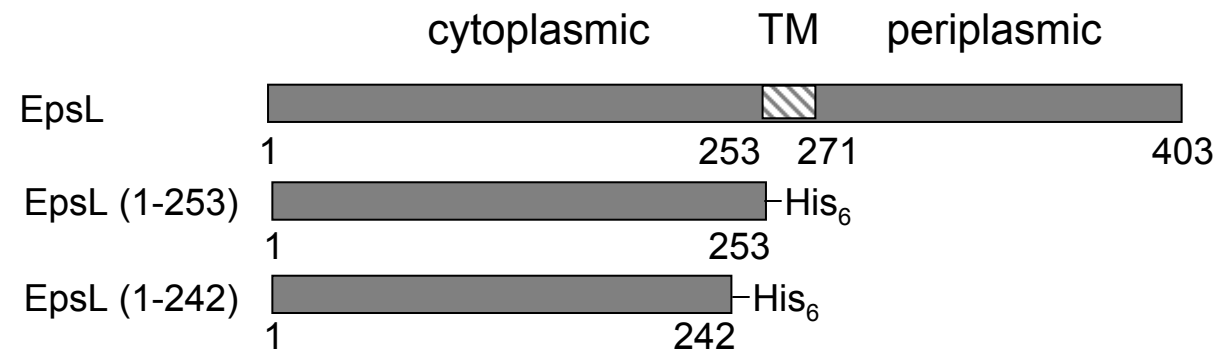

Supplement: 7601481s1.pdf [file 7601481s1.pdf]
